# Supplementary material for: Supramolecular polymers with alternating pillar[5]arene and pillar[6]arene units from a highly selective multiple host–guest complexation system and monofunctionalized pillar[6]arene
Source: Royal Society of Chemistry journal article supplement (doi:10.1039/c2sc20982a), 2012-01-01
Supplement: c2sc20982a.pdf [file c2sc20982a.pdf]

## **Electric Supplementary Information (ESI)**

### Supramolecular Polymers with Alternating Pillar[5]arene and Pillar[6]arene Units from Highly Selective Multiple Host-Guest Complexation System and Monofunctionalized Pillar[6]arene

*Tomoki Ogoshi,\* Hitoshi Kayama, Daiki Yamafuji, Takamichi Aoki,  
and Tada-aki Yamagishi*

#### **Table of Contents**

|                                                                                                                          |        |
|--------------------------------------------------------------------------------------------------------------------------|--------|
| <b>Experimental Section</b>                                                                                              | S1-S6  |
| <b>Figs. S1-S6</b> $^1\text{H}$ and $^{13}\text{C}$ NMR spectra                                                          | S7-S12 |
| <b>Fig. S7</b> Job plot for <b>1-3</b> complex                                                                           | S13    |
| <b>Fig. S8</b> ESI mass spectra of <b>1-3</b> complex                                                                    | S14    |
| <b>Fig. S9</b> Job plot for <b>2-3</b> complex                                                                           | S15    |
| <b>Fig. S10</b> $^1\text{H}$ NMR spectra of a mixture of <b>1</b> and <b>3</b> in acetone- $d_6$                         | S16    |
| <b>Fig. S11</b> Job plot for <b>2-4</b> complex                                                                          | S17    |
| <b>Fig. S12</b> ESI mass spectra of <b>2-4</b> complex                                                                   | S18    |
| <b>Fig. S13</b> $^1\text{H}$ NMR spectrum of a mixture of <b>1</b> , <b>2</b> , <b>3</b> and <b>4</b> in $\text{CDCl}_3$ | S19    |
| <b>Fig. S14</b> Variable concentration $^1\text{H}$ NMR spectra of <b>5</b> in $\text{CDCl}_3$                           | S20    |
| <b>Fig. S15</b> Variable concentration $^1\text{H}$ NMR spectra of <b>6</b> in $\text{CDCl}_3$                           | S21    |
| <b>Fig. S16</b> Variable concentration $^1\text{H}$ NMR spectra of a mixture of <b>5</b> and <b>6</b> in $\text{CDCl}_3$ | S22    |
| <b>Fig. S17</b> $^1\text{H}$ NMR spectra of a mixture of <b>5</b> and <b>6</b> in acetone- $d_6$                         | S23    |
| <b>Fig. S18</b> TM-AFM images of <b>5</b> and <b>6</b>                                                                   | S24    |
| <b>References</b>                                                                                                        | S25    |

## **Experimental Section**

**Determination of association constants.**  $^1\text{H}$  NMR titrations were done with solutions which had a constant concentration of guest (1 mM) and varying concentrations of host. By the non-linear curve-fitting methods, the association constants for **1-3**, **1-4**, and **2-4** complexes in  $\text{CDCl}_3$  were determined to be  $1350 \pm 75 \text{ M}^{-1}$ ,  $90.3 \pm 11 \text{ M}^{-1}$  and  $552 \pm 65 \text{ M}^{-1}$ , respectively, for 1:1 stoichiometry. The non-linear curve-fitting was based on the equation:<sup>S1</sup>

$$\Delta\delta_{\text{obs}} = \frac{\Delta\delta_{11}}{2K[\text{G}]_0} [1 + K[\text{H}]_0 + K[\text{G}]_0 - \{(1 + K[\text{H}]_0 + K[\text{G}]_0)^2 - 4K^2[\text{H}]_0[\text{G}]_0\}^{1/2}]$$

Where  $\Delta\delta_{\text{obs}}$  is the chemical shift change of proton signal of guest at  $[\text{H}]_0$ ,  $\Delta\delta_{11}$  is the chemical shift change of the guest proton resonance when the host is completely complexed,  $[\text{G}]_0$  is the fixed initial concentration of the guest, and  $[\text{H}]_0$  is the initial concentration of the host.

## Model Compounds

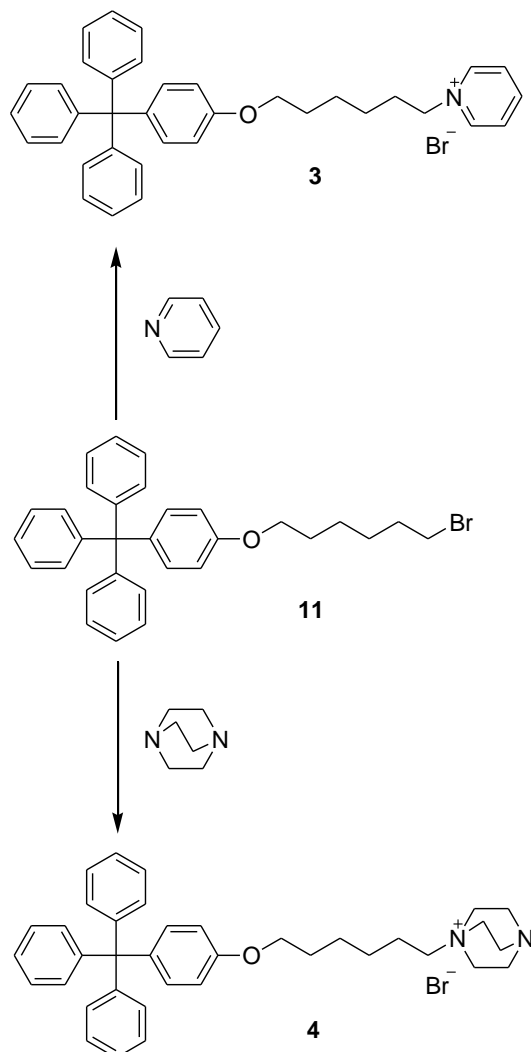

**3.** To a solution of pyridine (10 mL), **11**<sup>S2</sup> (200 mg, 0.401 mmol) was added. The mixture was heated at 80 °C for 12h under nitrogen. The resulting solution was concentrated under *vacuo*. The residue was poured into diethyl ether and the precipitate was collected by filtration (light pink solid, **3**, 223 mg, 0.386 mmol, Yield: 96%). <sup>1</sup>H NMR (CDCl<sub>3</sub>, 500 MHz, ppm): δ 9.44 (d, J = 6.3 Hz, 2H, pyridyl), 8.38 (t, J = 7.7 Hz, 1H, pyridyl), 8.01 (t, J = 6.5 Hz, 2H, pyridyl), 7.15-7.26 (m, 15 H, phenyl), 7.10 (d, J = 6.9 Hz, 2H, phenyl), 6.73 (d, J = 6.9 Hz, 2H, phenyl), 5.06 (t, J = 7.5 Hz, 2H, methylene), 3.90 (t, J = 5.7 Hz, 2H, methylene), 2.09 (m, 2H, methylene), 1.76 (m, 2H, methylene), 1.54 (m, 2H, methylene), 1.48 (m, 2H, methylene). <sup>13</sup>C NMR (CDCl<sub>3</sub>, 125 MHz, ppm): δ 156.9, 147.1, 145.1, 139.0, 132.2, 131.1, 128.4, 127.5, 125.9, 113.3 (C of

phenyl and pyridyl), 67.4 (C of methylene), 64.3 (sp<sup>3</sup> carbon of triaryl), 61.9, 31.8, 28.9, 25.7, 25.6 (C of methylene). LRFABMS:  $m/z$  Calcd for C<sub>36</sub>H<sub>36</sub>NO [M-Br]<sup>+</sup>: 498.2797, found 498. HRFABMS:  $m/z$  Calcd for C<sub>36</sub>H<sub>36</sub>NO [M-Br]<sup>+</sup>: 498.2797, found 498.2796. Melting point (T<sub>m</sub>): 193 °C.

**4.** To a solution of **11** (303 mg, 0.608 mmol) in acetone (20 mL), 1,4-diazabicyclo[2.2.2]octane (DABCO, 0.670 g, 2.74 mmol) was added. The mixture was refluxed for 12h under nitrogen. The resulting solution was concentrated under *vacuo*. The residue was poured into diethyl ether and the precipitate was collected by filtration (white solid, **4**, 361 mg, 0.591 mmol, Yield: 97%). <sup>1</sup>H NMR (CDCl<sub>3</sub>, 500 MHz, ppm): δ 7.15-7.29 (m, 15 H, phenyl), 7.10 (d, J = 8.6 Hz, 2H, phenyl), 6.75 (d, J = 8.0 Hz, 2H, phenyl), 3.93 (t, J = 6.0 Hz, 2H, methylene), 3.66 (t, J = 7.4 Hz, 6H, DABCO), 3.60 (t, J = 8.3 Hz, 2H, methylene), 3.25 (t, J = 8.3 Hz, 6H, DABCO), 1.78 (m, 4H, methylene), 1.44-1.60 (m, 4H, methylene). <sup>13</sup>C NMR (CDCl<sub>3</sub>, 125 MHz, ppm): δ 156.9, 147.0, 139.0, 132.2, 131.1, 127.4, 125.8, 113.2 (C of phenyl), 67.4, 64.4 (C of methylene), 64.3 (sp<sup>3</sup> carbon of triaryl), 52.5, 45.4 (C of DABCO), 29.1, 26.2, 25.8, 22.1 (C of methylene). LRFABMS:  $m/z$  Calcd for C<sub>37</sub>H<sub>43</sub>N<sub>2</sub>O [M-Br]<sup>+</sup>: 531.3375, found 531. HRFABMS:  $m/z$  Calcd for C<sub>37</sub>H<sub>43</sub>N<sub>2</sub>O [M-Br]<sup>+</sup>: 531.3375, found 531.3376. Melting point (T<sub>m</sub>): 217 °C.

**8.** Monofunctionalized pillar[5]arene **8** can be prepared by two different approaches. **8** was already prepared by co-cyclization approach.<sup>S3</sup> In this study, we synthesized **8** from mono-deprotected pillar[5]arene **7**. Under a nitrogen atmosphere **7** (434 mg, 0.589 mmol) was dissolved in acetone (5 mL). Potassium carbonate (162 mg, 1.17 mmol) was added and the reaction mixture was stirred. Then, 1,6-dibromohexane (719 mg, 2.95 mmol) was added and the reaction mixture was refluxed for 48h. After filtration, the filtrate was evaporated to give a solid. Column chromatography (silica gel; ethyl acetate: hexane = 1 : 6) afforded a white solid (**8**, 296 mg, 0.330 mmol, 56%).

**5.** To a solution of **8** (200 mg, 0.224 mmol) in acetone (20 mL), DABCO (124 mg, 1.11 mmol) was added. The mixture was refluxed for 12h under nitrogen. The resulting solution was concentrated under *vacuo*. The residue was poured into diethyl ether and the precipitate was collected by filtration (light pink solid, **5**, 143 mg, 0.141 mmol, Yield: 63%). <sup>1</sup>H NMR (CDCl<sub>3</sub>, 500 MHz, ppm): δ 6.83-6.88 (m, 10H, phenyl), 3.90 (t, 2H, J = 6.3 Hz, methylene), 3.65-3.76 (m, 43 H, methyl, methylene bridge and DABCO), 3.54 (m, 2H, methylene), 3.25 (t, J = 7.5 Hz, 6H, DABCO), 1.85-1.93 (m, 4H,

methylene), 1.68 (m, 2H, methylene), 1.51 (m, 2H, methylene).  $^{13}\text{C}$  NMR (acetone- $d_6$ , 125 MHz, ppm):  $\delta$  151.1, 150.8, 150.4, 150.0, 128.7, 128.6, 128.3, 115.3, 115.0, 114.8, 114.6, 114.3, 114.0 (C of phenyl), 67.6, 64.1 (C of methylene), 58.9, 56.6, 56.5, 56.3, 56.1, 55.9, 55.9, 55.7 (C of methyl), 52.3, 45.4 (C of DABCO), 30.2, 29.7, 29.5, 29.4 (C of methylene bridge), 28.9, 25.8, 25.1, 21.0 (C of methylene). LRFABMS:  $m/z$  Calcd for  $\text{C}_{56}\text{H}_{71}\text{N}_2\text{O}_{10}$   $[\text{M}-\text{Br}]^+$ : 931.5109, found 931. HRFABMS:  $m/z$  Calcd for  $\text{C}_{56}\text{H}_{71}\text{N}_2\text{O}_{10}$   $[\text{M}-\text{Br}]^+$ : 931.5109, found 931.5107. Melting point ( $T_m$ ): 111 °C.

**9.** To a solution of **2** (500 g, 0.468 mmol) in anhydrous dichloromethane (50 mL), boron tribromide (0.0395 mL, 0.421 mmol) was added. The mixture was stirred at 25 °C for 1 min under nitrogen. Then, water was added into the mixture. The organic layer was dried over anhydrous  $\text{Na}_2\text{SO}_4$ . After filtration, the filtrate was concentrated. Column chromatography (silica gel; hexane : ethyl acetate = 4 : 1) afforded a white solid (**9**, 224 mg, 0.215 mmol, Yield: 46%).  $^1\text{H}$  NMR ( $\text{CDCl}_3$ , 500 MHz, ppm):  $\delta$  6.80 (s, 1H, phenyl), 6.75 (s, 1H, phenol), 6.74 (s, 1H, phenyl), 6.72 (s, 1H, phenyl), 6.67 (s, 1H, phenyl), 6.65 (s, 1H, phenyl), 6.64 (s, 2H, phenyl), 6.63 (s, 2H, phenyl), 6.61 (s, 1H, phenyl), 6.56 (s, 2H, phenyl), 3.69-4.01 (m, 34H, methylene adjacent to O atom and methylene bridge), 1.17-1.42 (m, 33H, methyl).  $^{13}\text{C}$  NMR ( $\text{CDCl}_3$ , 125 MHz, ppm):  $\delta$  151.3, 150.5, 150.4, 150.3, 148.1, 147.8, 130.1, 129.3, 128.4, 128.2, 128.1, 127.9, 127.7, 127.6, 127.3, 126.5, 124.4, 118.6, 115.4, 115.3, 115.1, 115.0, 114.8, 114.4, 114.1 (C of phenyl), 64.8, 64.2, 64.1, 64.0, 63.8 (C of methylene adjacent O atom), 31.3, 31.0, 30.7, 30.4, 30.3, 29.6 (C of methylene bridge), 15.1, 15.0, 14.9, 14.6 (C of methyl). LRFABMS:  $m/z$  Calcd for  $\text{C}_{64}\text{H}_{80}\text{O}_{12}$   $[\text{M}]^+$ : 1040.5650, found 1040. HRFABMS:  $m/z$  Calcd for  $\text{C}_{64}\text{H}_{80}\text{O}_{12}$   $[\text{M}]^+$ : 1040.5650, found 1040.5666. Melting point ( $T_m$ ): 75 °C.

**6.** Under a nitrogen atmosphere **9** (100 mg, 0.0959 mmol) was dissolved in acetone (1 mL). Potassium carbonate (394 mg, 2.90 mmol) was added and the reaction mixture was stirred. Then, 1,6-dibromohexane (0.234 mg, 0.959 mmol) was added and the reaction mixture was refluxed for 24h. After filtration, the filtrate was evaporated to give a solid. Column chromatography (silica gel; ethyl acetate: hexane = 1 : 6) afforded a white solid (**10**, 81.0 mg, 0.0673 mmol, Yield: 54%).  $^1\text{H}$  NMR ( $\text{CDCl}_3$ , 500 MHz, ppm):  $\delta$  6.62-6.71 (s, 12H, phenyl), 3.78-3.82 (m, 34H, methylene adjacent to O atom and methylene bridge), 3.30 (t, 2H,  $J = 6.6$  Hz, methylene adjacent to O atom), 1.76 (br, 2H, methylene), 1.66 (br, 2H, methylene), 1.36 (br, 4H, methylene), 1.25-1.30 (m, 33H, methyl).  $^{13}\text{C}$  NMR ( $\text{CDCl}_3$ , 125 MHz, ppm):  $\delta$  150.5, 150.4, 150.3, 127.9, 127.8, 115.4, 115.3, 115.2, 115.0 (C of phenyl), 68.2 (C of methylene linker), 64.0 (C of methylene

adjacent to O atom), 33.8, 32.6 (C of methylene), 31.2, 31.0, 30.9, 30.8, 30.7 (C of methylene bridge) 29.4, 27.9, 25.3 (C of methylene), 15.2 (C of methyl). To a solution of pyridine (10 mL), **10** (100 mg, 0.0829 mmol) was added. The mixture was heated at 80 °C for 24h under nitrogen. The resulting solution was concentrated under *vacuo* (light brown solid, **6**, 72.0 mg, 0.0561 mmol, Yield: 68%). <sup>1</sup>H NMR (acetone-*d*<sub>6</sub>, 500 MHz, ppm): δ 7.37 (br, 1H, pyridyl), 6.56-7.07 (m, 14H, pyridyl and phenyl), 6.35 (br, 2H, pyridyl), 3.59-4.10 (m, 34H, methylene adjacent to O atom and methylene bridge), 2.95 (br, 2H, methylene), 1.75 (br, 2H, methylene), 1.56 (br, 2H, methylene), 1.22-1.46 (m, 35H, methylene and methyl), 0.86 (br, 2H, methylene). <sup>13</sup>C NMR (CDCl<sub>3</sub>, 125 MHz, ppm): δ 151.0, 150.7, 150.5, 150.3, 150.2, 150.0, 144.3, 142.7, 129.2, 129.1, 129.0, 127.7, 127.0, 126.9, 117.2, 116.9, 116.2, 116.1, 115.9, 115.7, 114.3, 113.8 (C of phenyl and pyridyl), 65.5, 65.1, 64.8, 64.5, 64.1, 63.8 (C of methylene adjacent to O atom), 58.6 (C of methylene adjacent to N atom), 32.5 (C of methylene bridge), 31.9 (C of methylene), 30.6, 30.2, 29.8, 29.7, 29.1 (C of methylene bridge), 27.5, 22.6, 21.5 (C of methylene), 15.3 (C of methyl). LRFABMS: *m/z* Calcd for C<sub>75</sub>H<sub>96</sub>NO<sub>12</sub> [M-Br]<sup>+</sup>: 1202.6933, found 1202. HRFABMS: *m/z* Calcd for C<sub>75</sub>H<sub>96</sub>NO<sub>12</sub> [M-Br]<sup>+</sup>: 1202.6933, found 1202.6925. Melting point (T<sub>m</sub>): 109 °C.

# $^1\text{H}$ and $^{13}\text{C}$ NMR spectra of 3

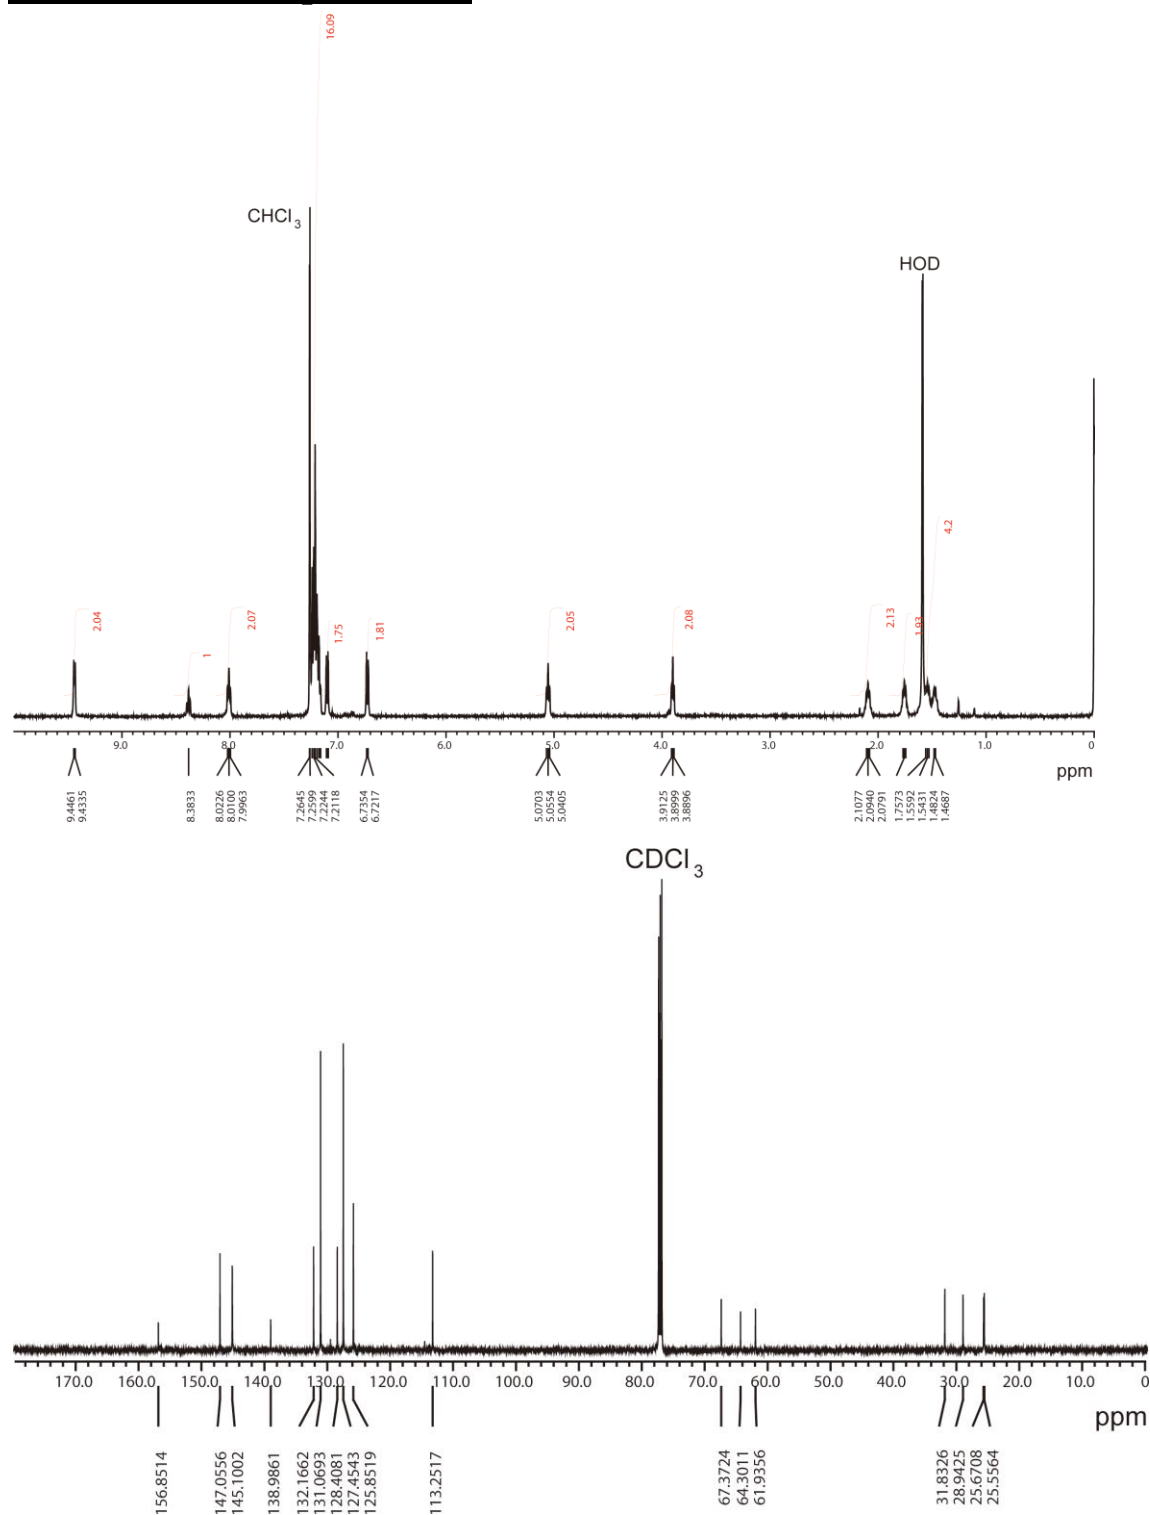

**Fig. S1**  $^1\text{H}$  and  $^{13}\text{C}$  NMR spectra of 3 in  $\text{CDCl}_3$  at 25 °C.

# <sup>1</sup>H and <sup>13</sup>C NMR spectra of 4

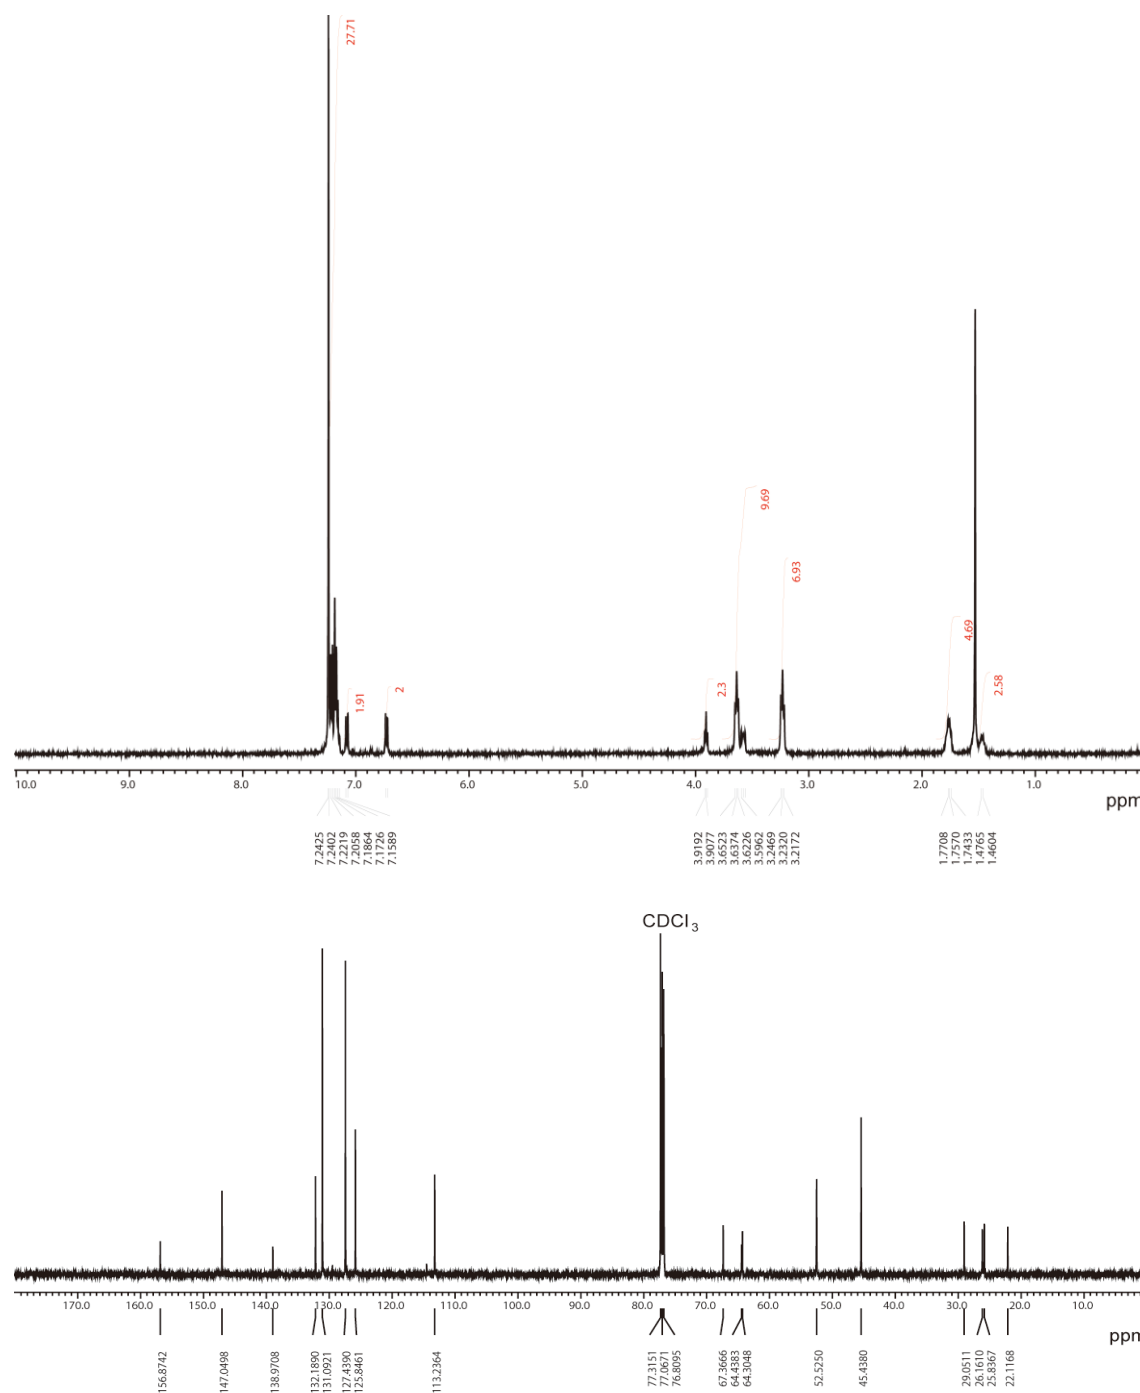

**Fig. S2** <sup>1</sup>H and <sup>13</sup>C NMR spectra of **4** in CDCl<sub>3</sub> at 25 °C.



# <sup>1</sup>H and <sup>13</sup>C NMR spectra of **5**

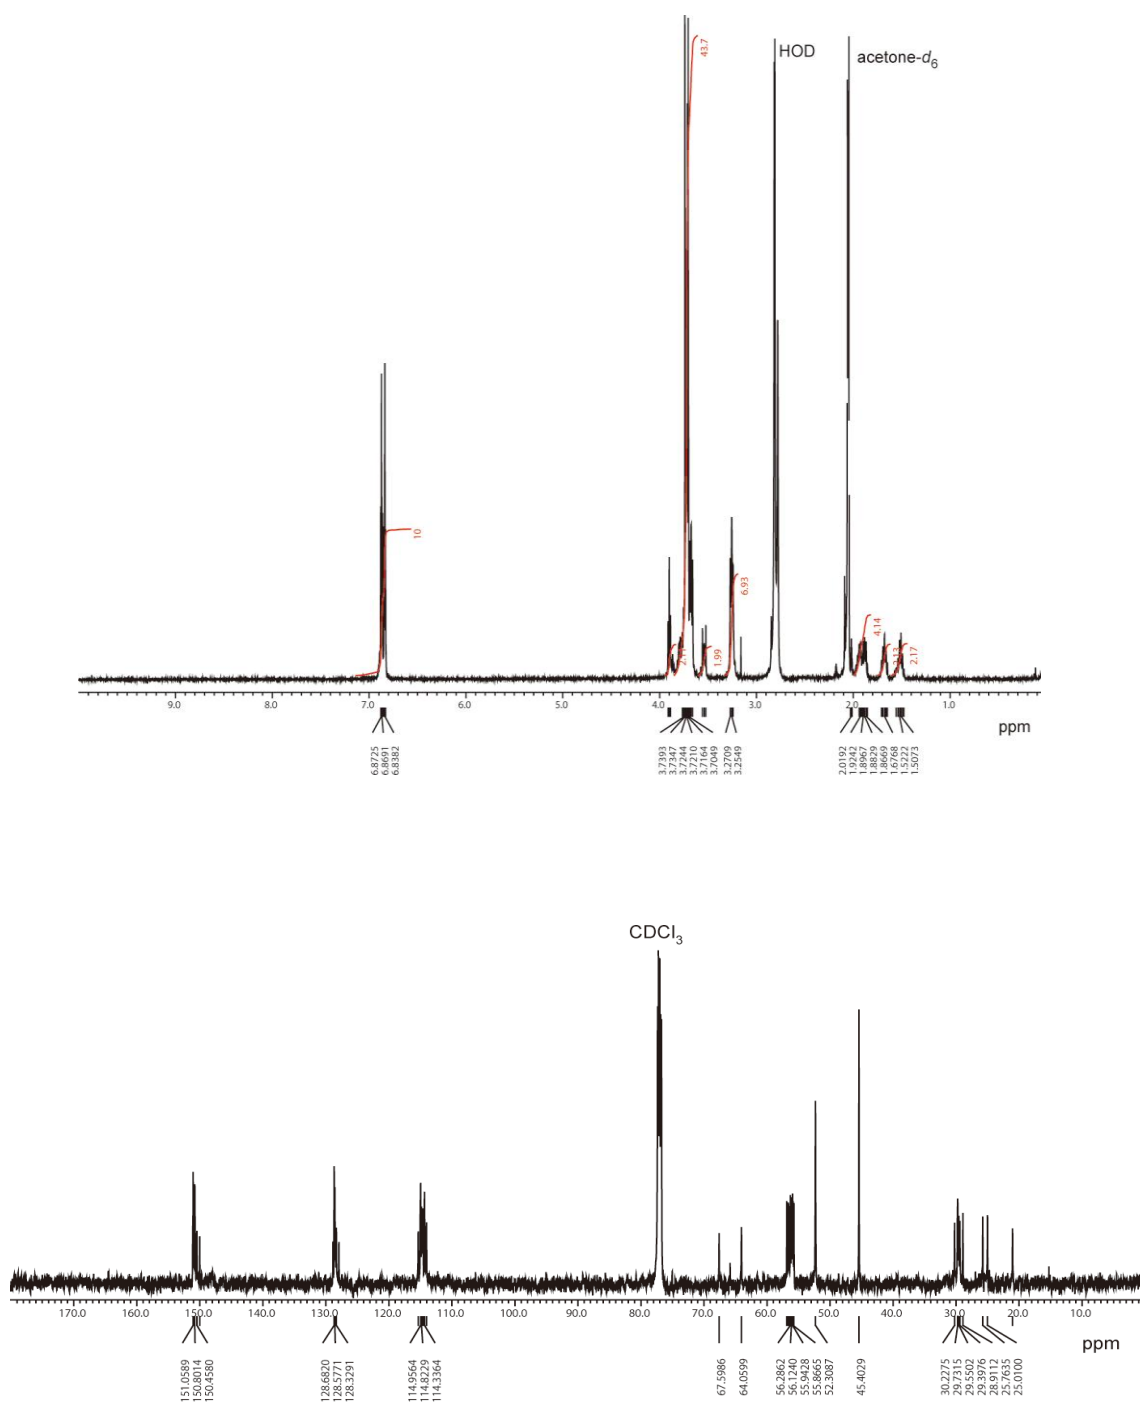

Fig. S3 <sup>1</sup>H NMR spectrum of **5** in acetone-*d*<sub>6</sub> and <sup>13</sup>C NMR spectrum of **5** in CDCl<sub>3</sub> at 25 °C.

# <sup>1</sup>H and <sup>13</sup>C NMR spectra of 9

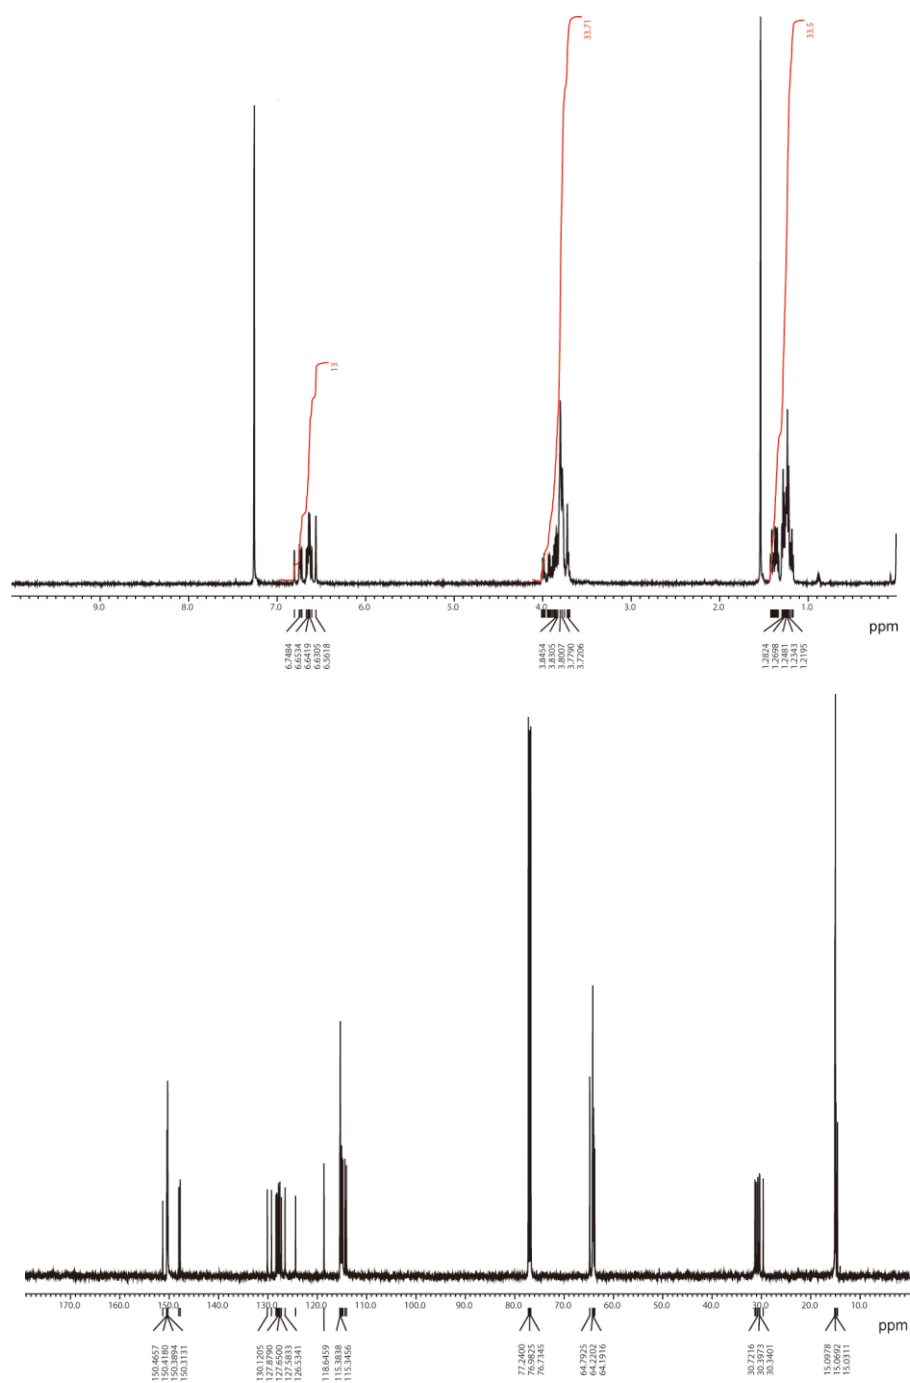

**Fig. S4** <sup>1</sup>H and <sup>13</sup>C NMR spectra of **9** in CDCl<sub>3</sub> at 25 °C

# <sup>1</sup>H and <sup>13</sup>C NMR spectra of 10

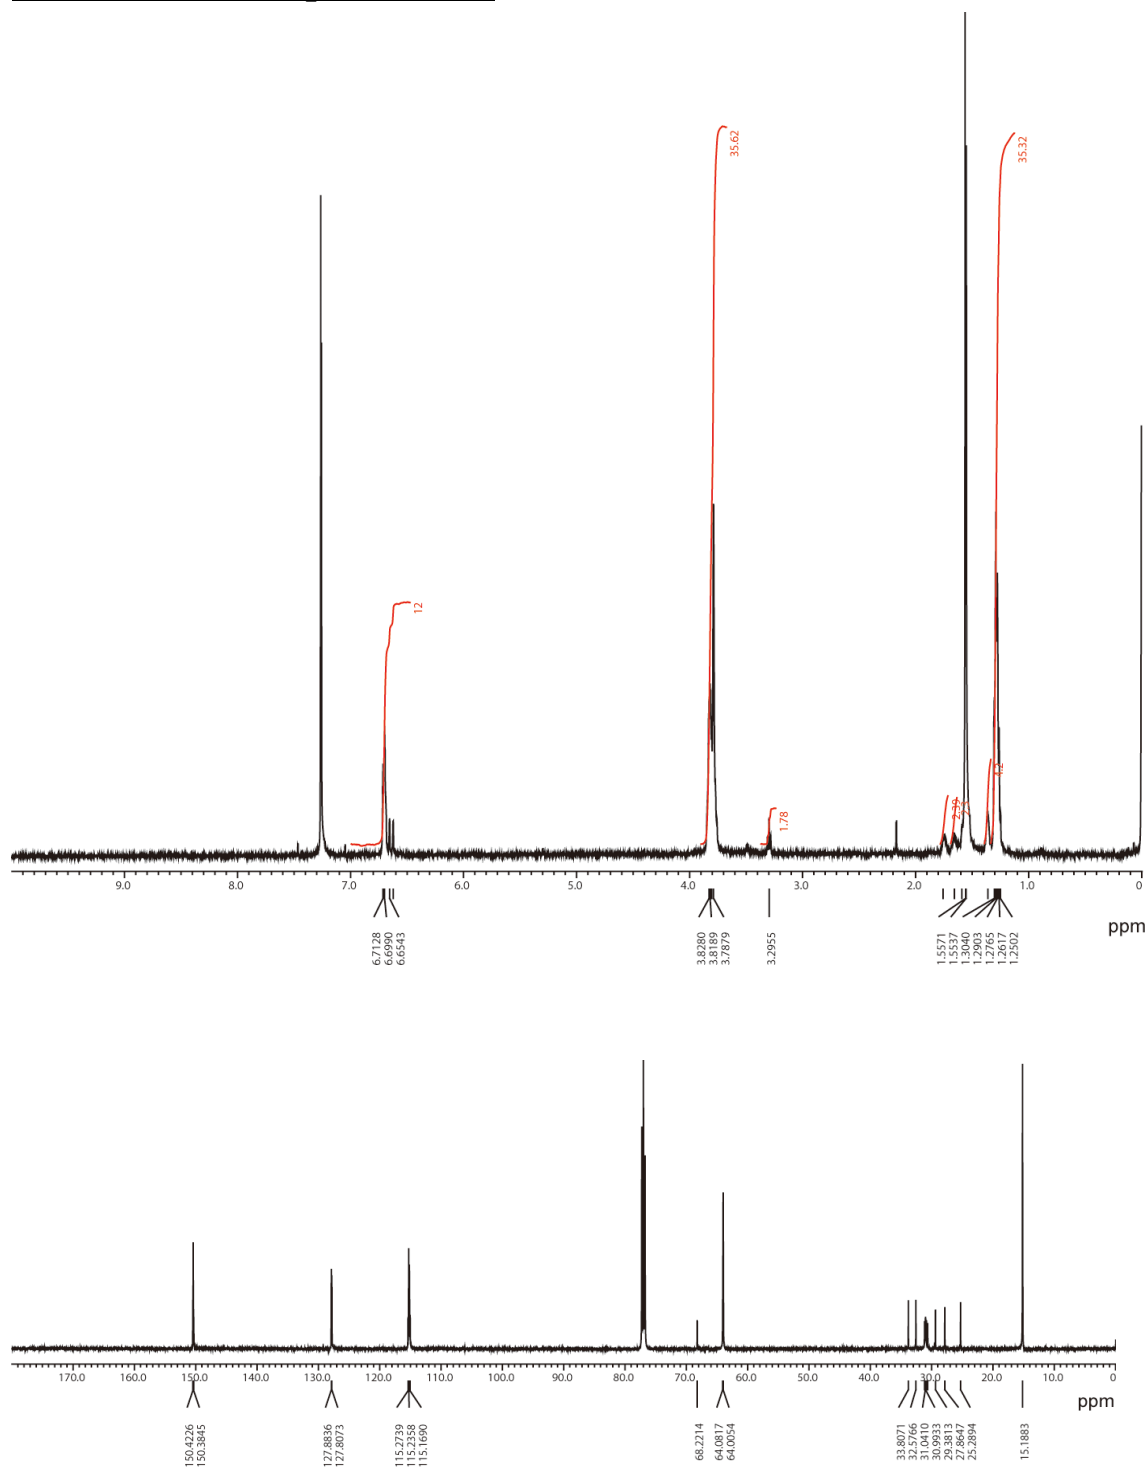

**Fig. S5** <sup>1</sup>H and <sup>13</sup>C NMR spectra of **10** in CDCl<sub>3</sub> at 25 °C.

# $^1\text{H}$ and $^{13}\text{C}$ NMR spectra of 6

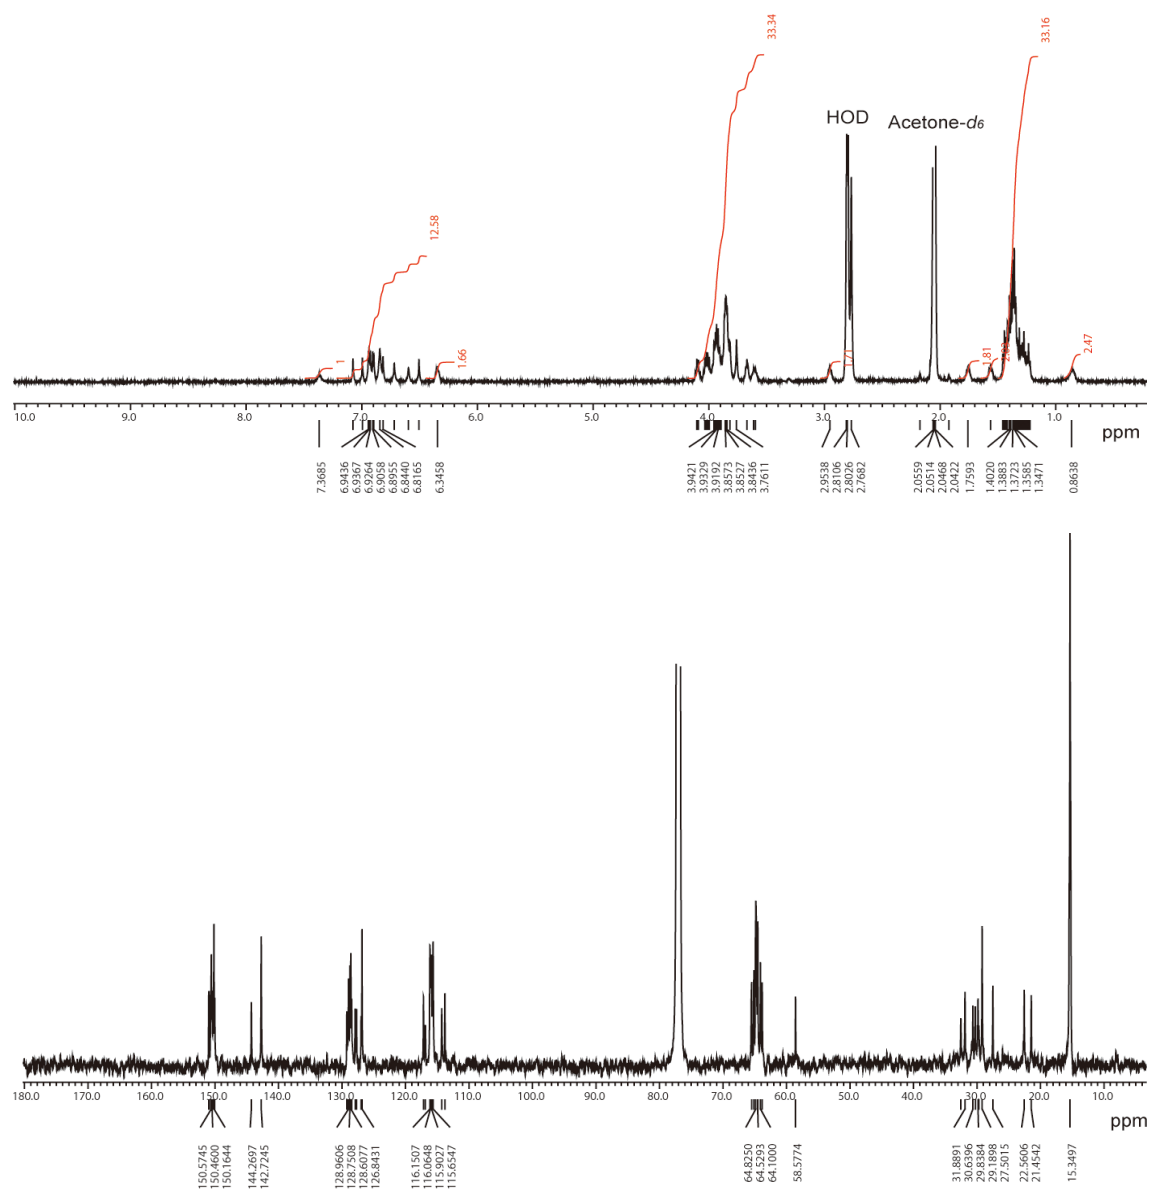

**Fig. S6**  $^1\text{H}$  NMR spectrum of **6** in acetone- $d_6$  and  $^{13}\text{C}$  NMR spectrum of **6** in  $\text{CDCl}_3$  at 25 °C.

### Job Plot for 1-3 Complex

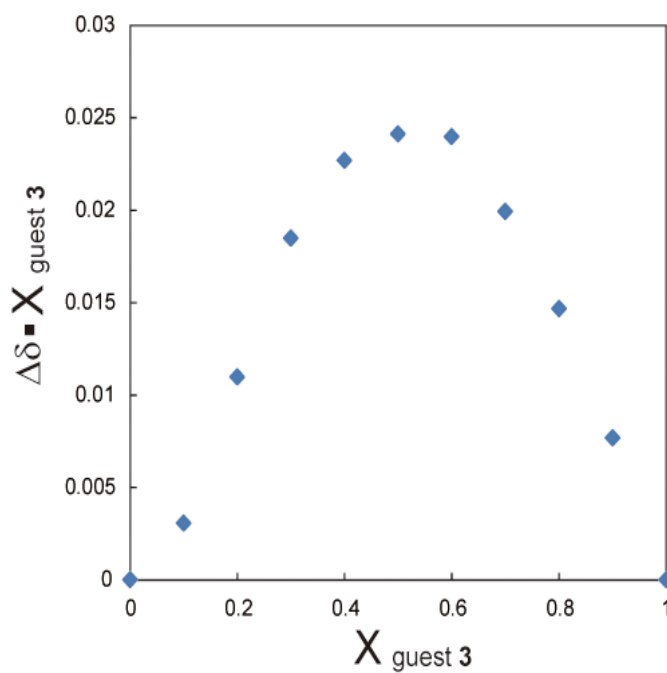

**Fig. S7** Job plot between **1** (host) and **3** (guest) was collected by plotting the  $\Delta\delta$  in chemical shift of the proton signal of pyridinium moiety (**Fig. 2b**, peak b) of **3** observed by  $^1\text{H}$  NMR spectroscopy against the change in the mole fraction of the guest ( $X_{\text{guest } 3}$ ). Concentration:  $[\mathbf{1}] + [\mathbf{3}] = 10 \text{ mM}$ . The plot indicates a 1:1 binding between the host and guest.

### **ESIMS for a mixture of 1 and 3**

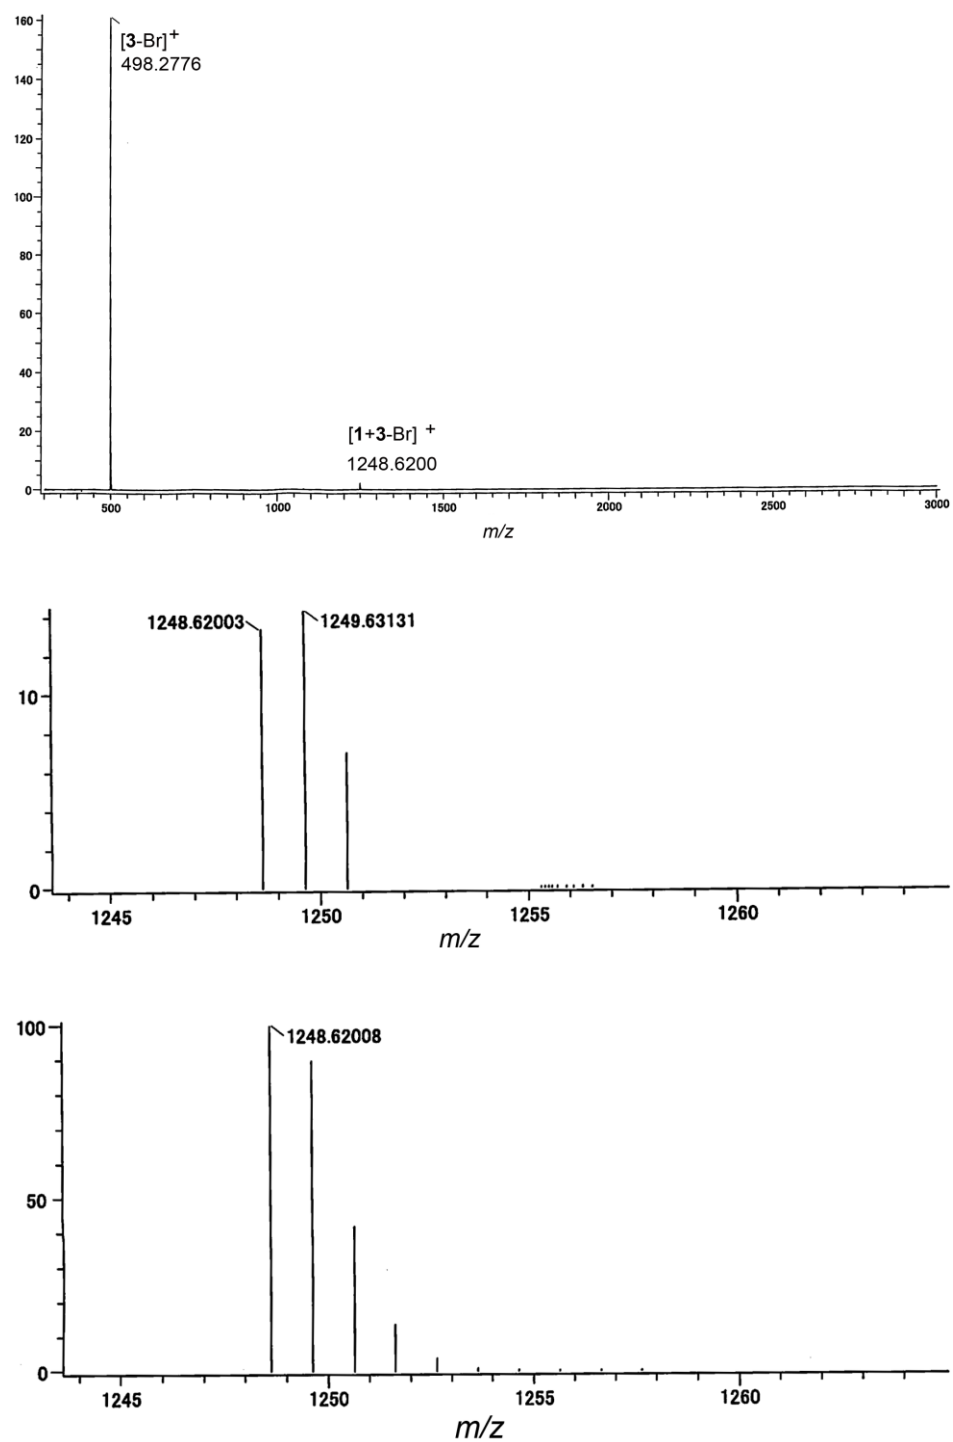

**Fig. S8** ESI mass spectra of a mixture of **1** and **3**. Detection of the peak corresponding to  $[1 + 3 - Br]^+$  indicates formation of the 1:1 complex.

### Job Plot for 2-3 Complex

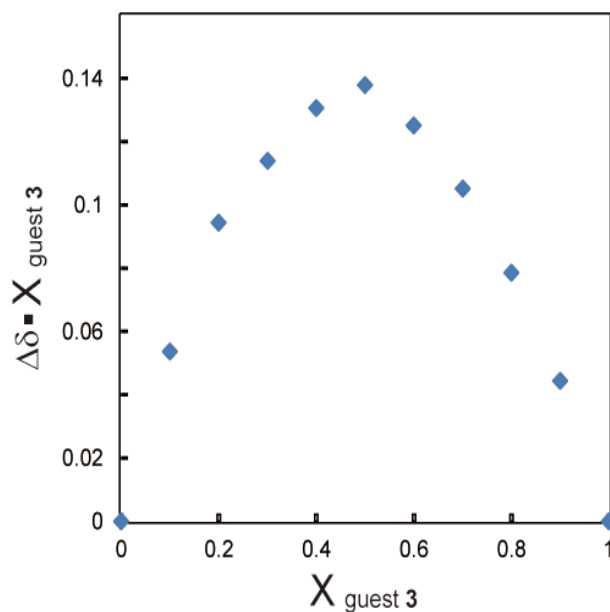

**Fig. S9** Job plot between **2** (host) and **3** (guest) was collected by plotting the  $\Delta\delta$  in chemical shift of the proton signal of pyridinium moiety (**Fig. 2c**, peak b) of **3** observed by  $^1\text{H}$  NMR spectroscopy against the change in the mole fraction of the guest ( $X_{\text{guest } 3}$ ). Concentration:  $[\mathbf{2}] + [\mathbf{3}] = 10 \text{ mM}$ . The plot indicates a 1:1 binding between the host and guest.

# **$^1\text{H}$ NMR spectra of a mixture of **1** and **3** in acetone- $d_6$**

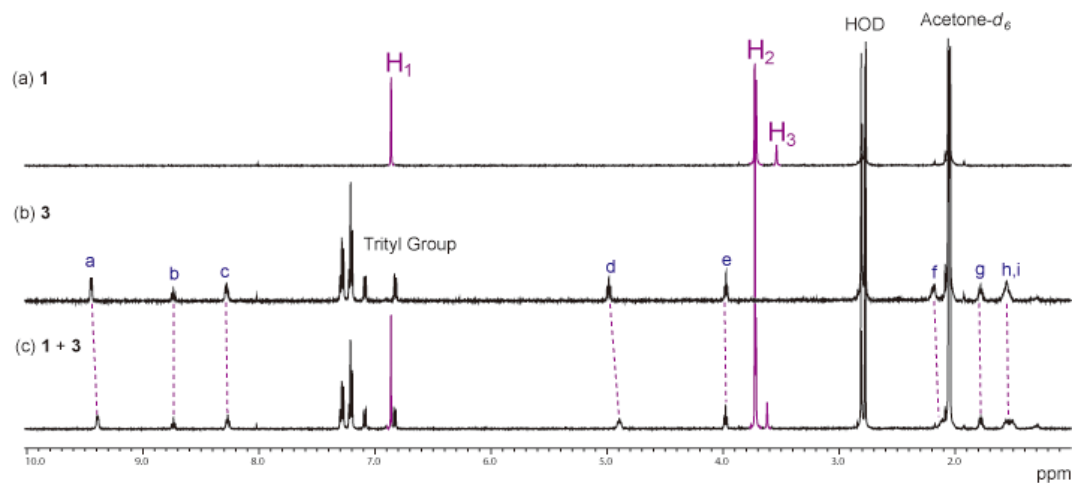

**Fig. S10**  $^1\text{H}$  NMR spectra of (a) **1**, (b) **3**, (c) a mixture of **1** and **3** at 1 mM in acetone- $d_6$  at 25 °C. Only small shifts were observed for the proton signals of the pyridinium and methylene of **3** upon addition of **1**. This observation suggests very weak binding between host **1** and guest **3**. Due to the weak binding, an association constant could not be calculated for this complex.



### Job Plot for 2-4 Complex

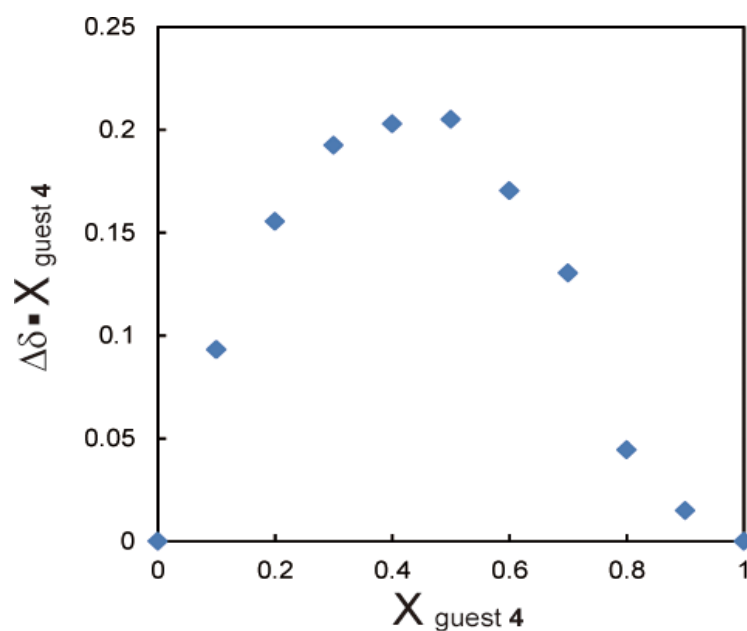

**Fig. S11** Job plot between **2** (host) and **4** (guest) was collected by plotting the  $\Delta\delta$  in chemical shift of the proton signal of DABCO moiety (**Fig. 2g**, peak b) of **4** observed by  $^1\text{H}$  NMR spectroscopy against the change in the mole fraction of the guest ( $X_{\text{guest } 4}$ ). Concentration:  $[\mathbf{2}] + [\mathbf{4}] = 10 \text{ mM}$ . The plot indicates a 1:1 binding between the host and guest.

## **ESIMS for a mixture of 2 and 4**

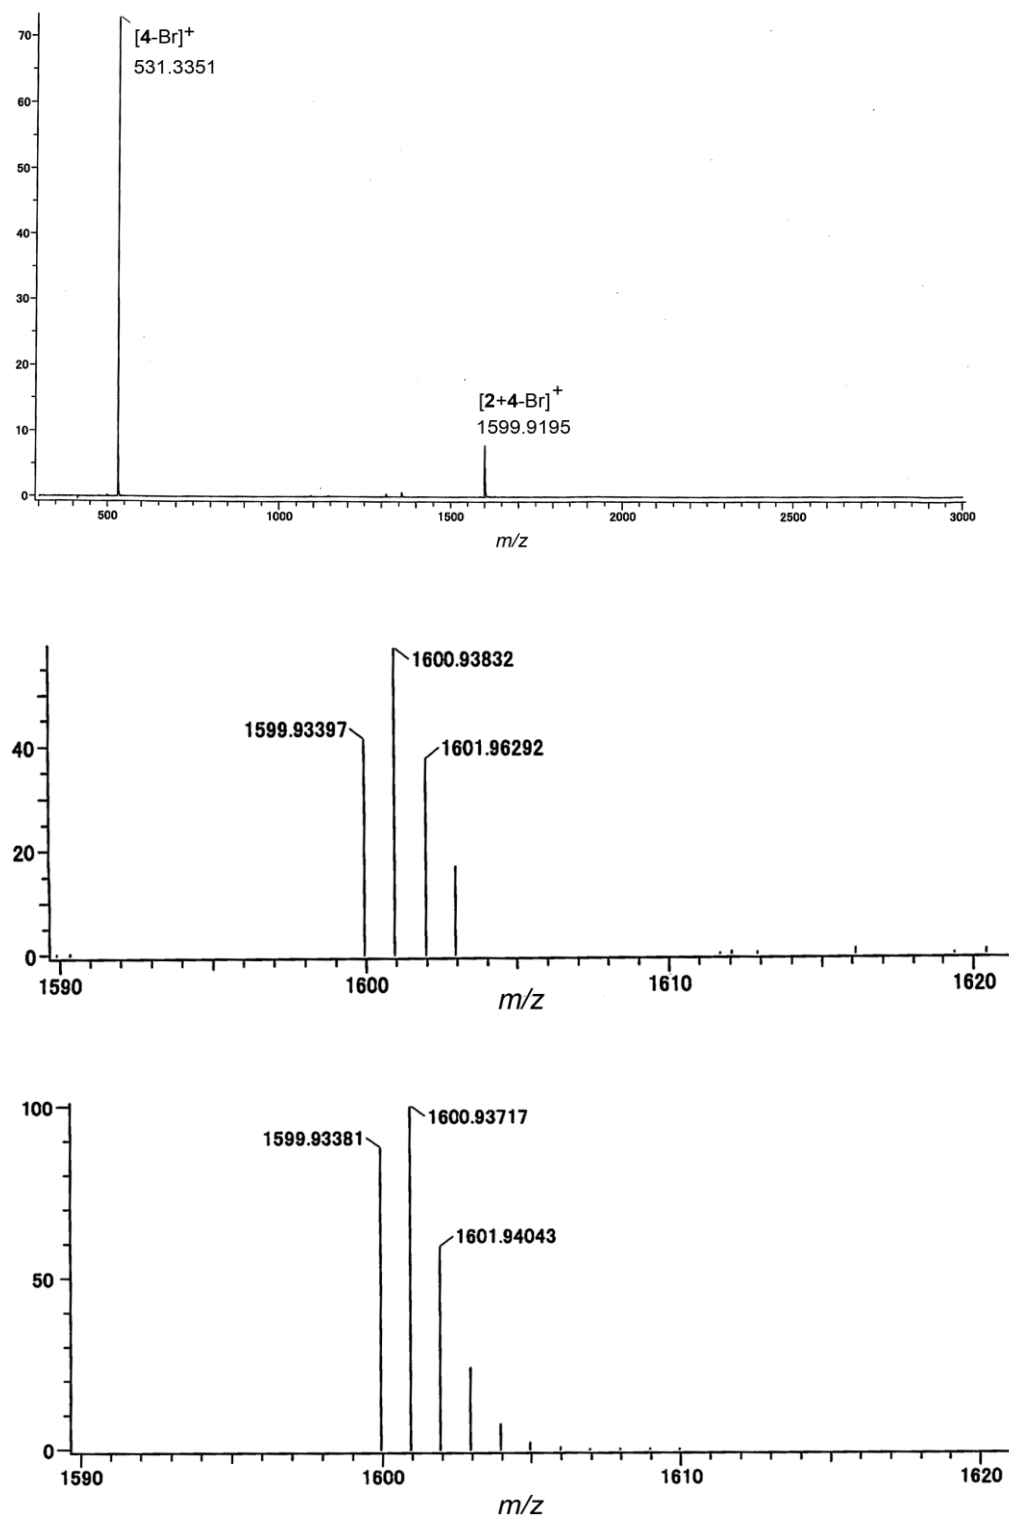

**Fig. S12** ESI mass spectra of a mixture of **2** and **4**. Detection of the peak corresponding to  $[2 + 4 - Br]^+$  indicates formation of the 1:1 complex.

# <sup>1</sup>H NMR spectrum of a mixture of 1, 2, 3 and 4 in CDCl<sub>3</sub>

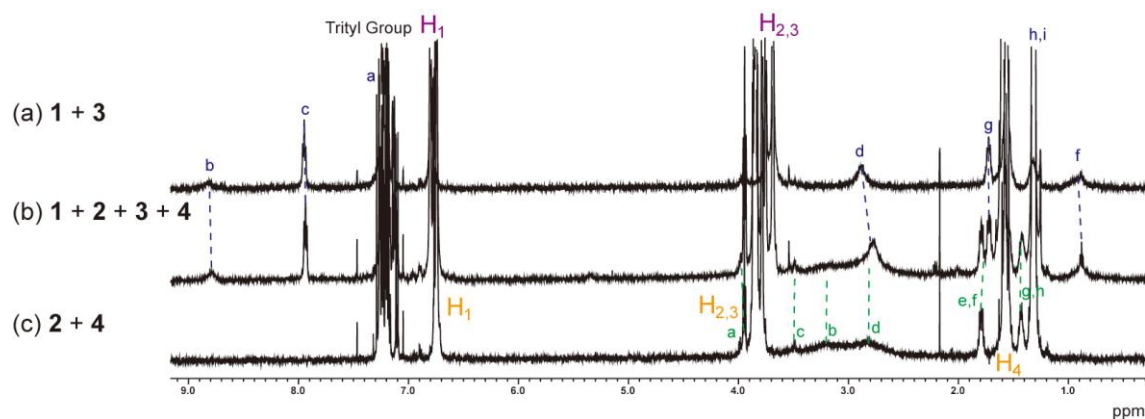

**Fig. S13** <sup>1</sup>H NMR spectra of an equimolar mixture of (a) **1** and **3**, (b) **1**, **2**, **3** and **4** and (c) **2** and **4** at 1 mM in CDCl<sub>3</sub> at 25 °C. Resonances are labeled in **Fig. 1**. The peak shifts of **3** and **4** in (b) were same in those of the mixture of **1** and **3** in (a), and **2** and **4** in (c), respectively, indicating the self-sorting organization.

## Variable concentration $^1\text{H}$ NMR spectra of **5**

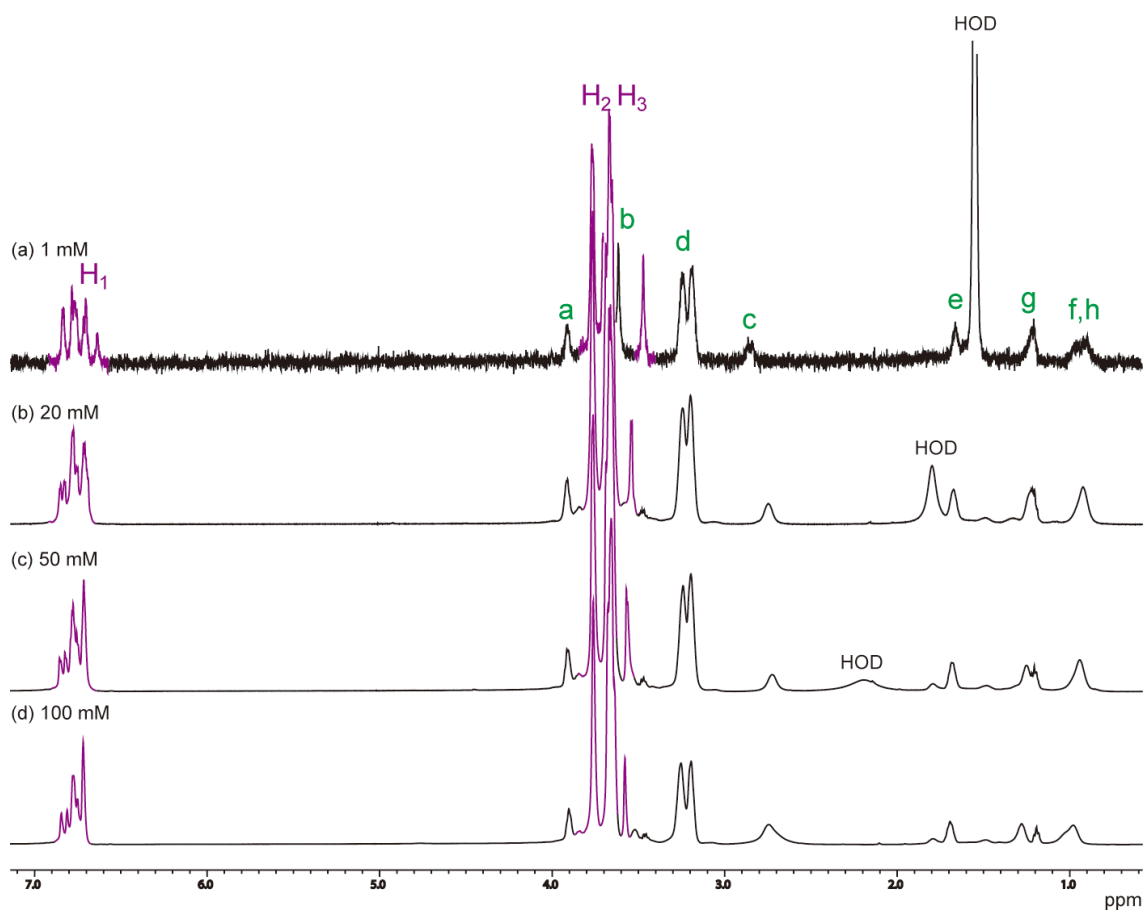

**Fig. S14** Variable concentration  $^1\text{H}$  NMR spectra of **5** in  $\text{CDCl}_3$  at 25  $^\circ\text{C}$ . The proton resonances of **5** were independent of the concentration. These data indicate no formation of intra-/inter-molecular complex of **5** in  $\text{CDCl}_3$ .

## Variable concentration $^1\text{H}$ NMR spectra of **6**

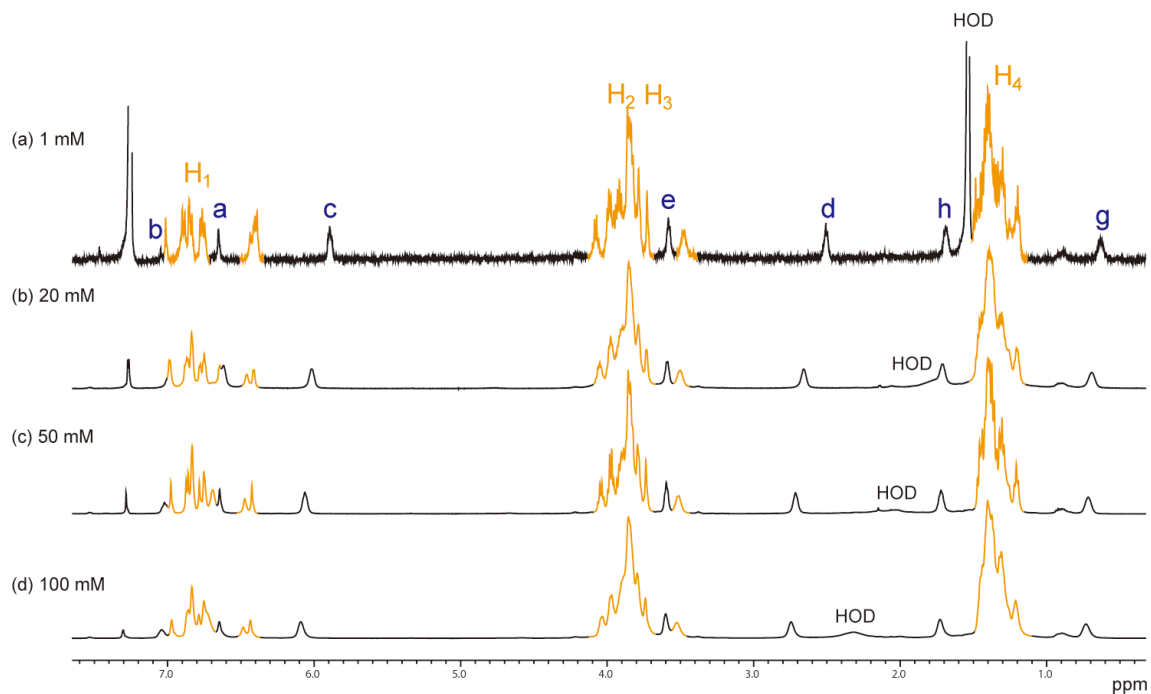

**Fig. S15** Variable concentration  $^1\text{H}$  NMR spectra of **6** in  $\text{CDCl}_3$  at 25 °C. Proton resonances of **6** in  $\text{CDCl}_3$  did not change in high and diluted concentrations. The supramolecular structure of **6** was independent of the concentration. Considering the weak association constant between pyridinium guest **2** and pillar[6]arene **3** ( $90.3 \pm 11 \text{ M}^{-1}$ ), a self-inclusion complex or oligomers should be formed.

## **Variable concentration $^1\text{H}$ NMR spectra of a mixture of 5 and 6**

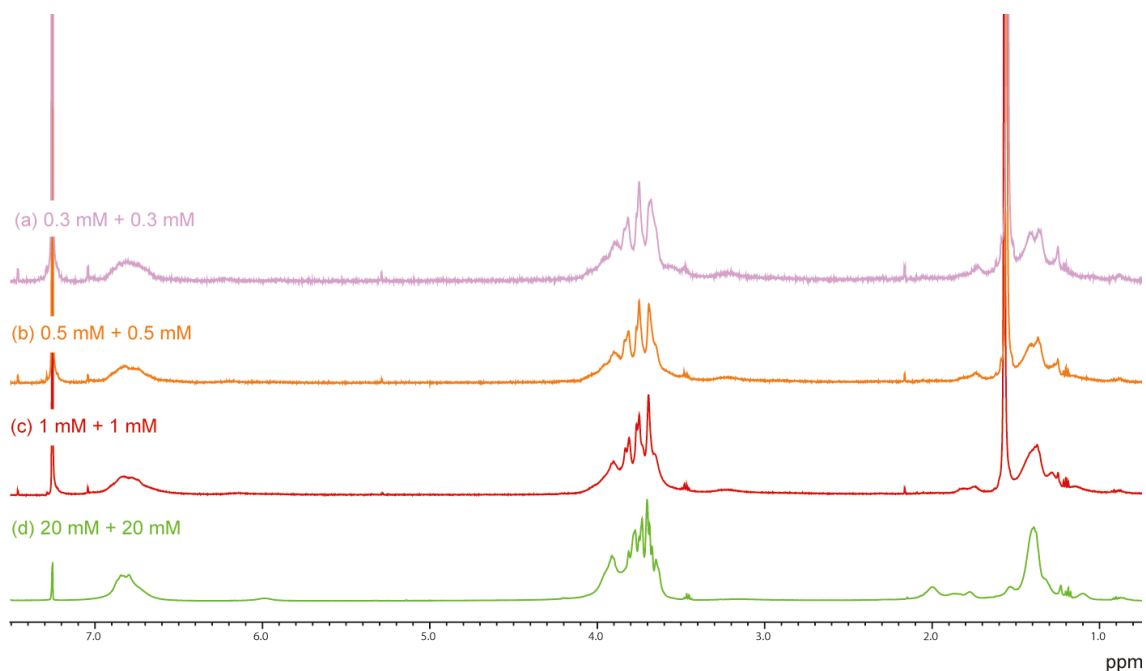

**Fig. S16** Variable concentration  $^1\text{H}$  NMR spectra of a 1:1 mixture of **5** and **6** in  $\text{CDCl}_3$  at 25 °C. The broadening of the peaks did not change in high and diluted concentrations. The supramolecular polymer consisting of **5** and **6** was formed even in the diluted concentration investigated.

**$^1\text{H}$  NMR spectra of a mixture of **5** and **6** in acetone- $d_6$**

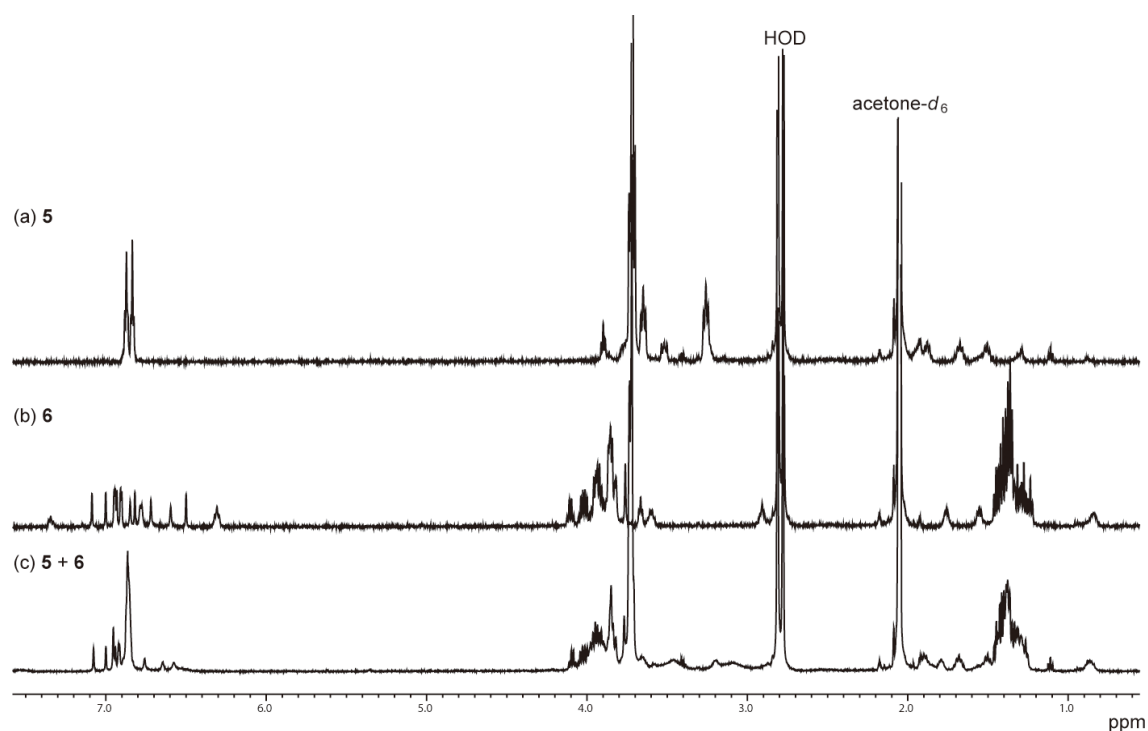

**Fig. S17**  $^1\text{H}$  NMR spectra of (a) **5**, (b) **6** and (c) a mixture of **5** and **6** at 1 mM in acetone- $d_6$  at 25 °C. The broadening was not observed in the 1:1 mixture of **5** and **6** in acetone- $d_6$ . Since the pyridinium derivative **3** hardly formed the host-guest complex with pillar[5]arene **1** in acetone- $d_6$  (**Fig. S10**), formation of the supramolecular polymer did not take place in acetone- $d_6$ .

### TM-AFM images

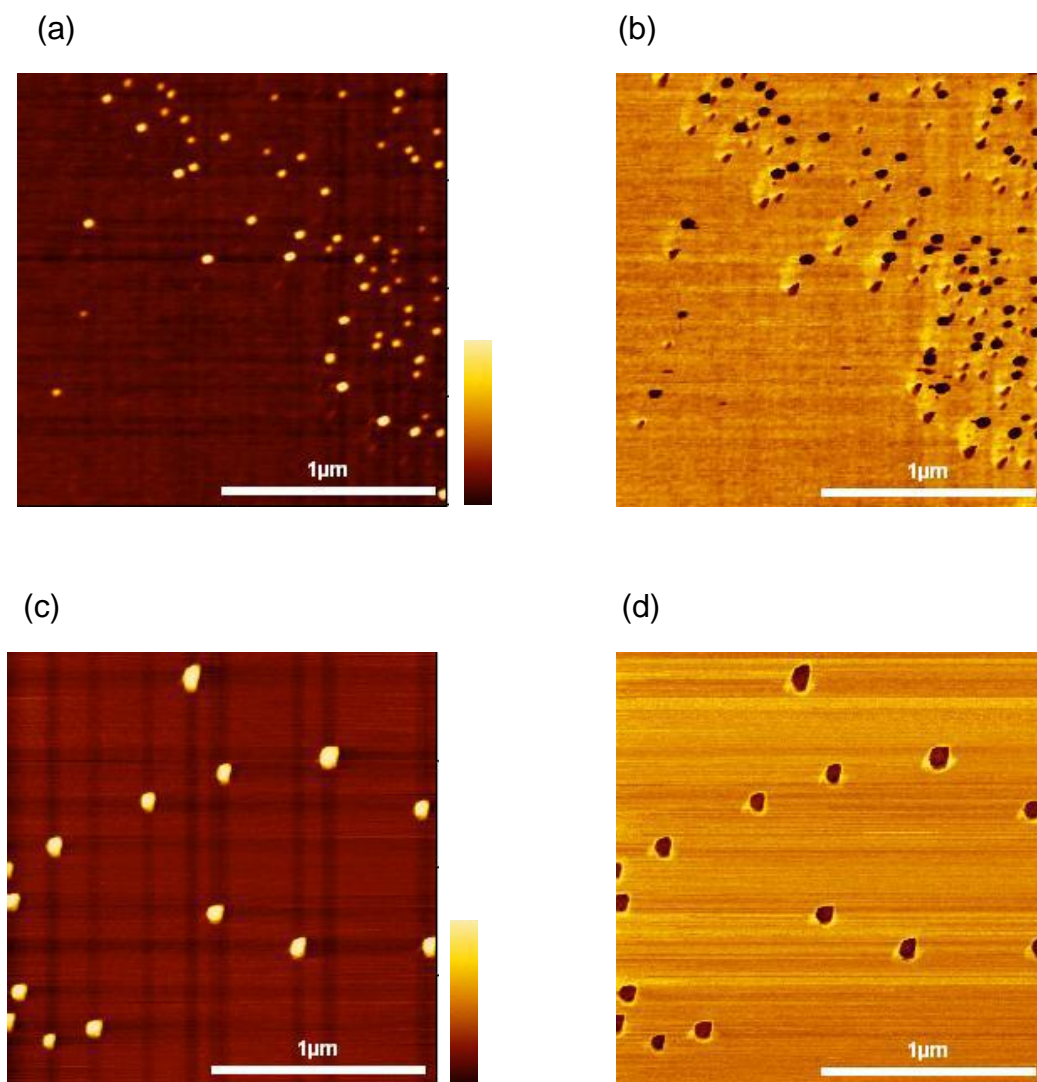

**Fig. S18** TM-AFM images of (a,b) **5** and (c,d) **6**, (a,c) height images, (b,d) phase images. Spherical-shaped assemblies were observed.



## References

- (S1) P. R. Ashton, R. Ballardini, V. Balzani, M. Bělohradský, M. T. Gandolfi, D. Philp, L. Prodi, F. M. Raymo, M. V. Reddington, N. Spencer, J. F. Stoddart, M. Venturi and D. J. Williams, *J. Am. Chem. Soc.*, 1996, **118**, 4931.
- (S2) W. Zhou, H. Zheng, Y. Li, H. Liu and Y. Li, *Org. Lett.*, 2010, **12**, 4078.
- (S3) L. Liu, D. Cao, Y. Jin, H. Tao, Y. Kou and H. Meier, *Org. Biomol. Chem.*, 2011, **9**, 7007.
